# Supplementary material
Source: MDPI journal article supplement (https://www.mdpi.com/2071-1050/14/19/12003)
Supplement: s1 [file s1]

### **Supplementary Material S1: Open-ended questionnaire for students and the teachers focus groups**

1. Were ICT normally used to support teaching? If so, in what way? With what type of technological and digital resources?
2. Do you think that teacher training and student training in ICT use are sufficient for ICT to be suitably incorporated into teaching? Why?
3. How did online teaching take place during lockdown? What resources were used?
4. How was the teaching follow-up favoured? We refer to aspects like theoretical sessions, evaluation activities, planning time, tutoring, etc.
5. What role did students play when this methodology was followed? And teachers?
6. What other support agents in the emotional and academic facets were available for teaching during lockdown?
7. What overall evaluation could you make of the methodology followed during virtual teaching?
8. Do you think that students and centres have enough means (technological resources, devices and infrastructures) to give hybrid teaching?
9. How were the subjects and follow-up of hybrid (face-to-face and virtual) teaching structured? What resources were used? How were the follow-up and accompaniment of teaching considered?
10. How do you perceive the role that students play in online teaching? Is it similar to the role they may play during face-to-face teaching? What about teachers? Did they apply any kind of measure to facilitate the teaching follow-up? In what way?
11. What are the advantages and disadvantages of this teaching model offer based on the use of technologies and the Internet? Which elements will make the e-learning methodology in virtual teaching in a university context easy and/or difficult?
12. Do you think that e-learning is a suitable methodology to ensure that different subject matters are learned? Do you think that e-learning has had, or may have, an influence on academic performance?
13. How you think that this online teaching methodology influences contact and support between teachers and students? And among students?
14. What strong points and possible mistakes did you find when e-learning was applied during this academic year? How do you think it can continue to be improved?
