# Supplementary material
Source: MDPI journal article supplement (https://www.mdpi.com/2071-1050/14/19/12003)
Supplement: s1 [file s1 › Supplementary Material S3.pdf]

### Supplementary Material S3: Consolidated criteria for reporting qualitative studies (COREQ) 32-item checklist

This is the COREQ checklist which accompanies the qualitative data gathering analysis for this dataset. Authors are as follows:

Juan Carlos Bustamante <sup>1</sup>

Manuel Segura Berges <sup>2</sup>

Manuel Lizalde-Gil <sup>3</sup>

Carlos Peñarrubia-Lozano <sup>3</sup>

1. Department of Psychology and Sociology, University of Zaragoza, Zaragoza, Spain.

2. Colegio Compañía de María, Zaragoza, Spain.

3. Department of Musical, Plastic and Corporal Expression, University of Zaragoza, Zaragoza, Spain.

| No                                                 | Item                    | Guide questions/description                                                                                                                                                                    |
|----------------------------------------------------|-------------------------|------------------------------------------------------------------------------------------------------------------------------------------------------------------------------------------------|
| <b>Domain 1:<br/>Research team and reflexivity</b> |                         |                                                                                                                                                                                                |
| Personal Characteristics                           |                         |                                                                                                                                                                                                |
| 1.                                                 | Interviewer/facilitator | <b>Which author/s conducted the interview or focus group?</b><br>Second author and fourth author. The first and the third authors were not involved in data collection.                        |
| 2.                                                 | Credentials             | <b>What were the researcher's credentials? E.g. PhD, MD</b><br>The 2 <sup>nd</sup> author is a PhD candidate. The other authors are PhD.                                                       |
| 3.                                                 | Occupation              | <b>What was their occupation at the time of the study?</b><br>The 2 <sup>nd</sup> author is a primary teacher and PhD candidate. The other authors are Associate Professors at university.     |
| 4.                                                 | Gender                  | <b>Was the researcher male or female?</b><br>All authors are male.                                                                                                                             |
| 5.                                                 | Experience and training | <b>What experience or training did the researcher have?</b><br>The authors have 16, 5, 25 and 15 years of experience as researchers. The first author is a neuropsychological scientists and a |

| No                            | Item                                     | Guide questions/description                                                                                                                                                                                                                                                                                                                                                  |
|-------------------------------|------------------------------------------|------------------------------------------------------------------------------------------------------------------------------------------------------------------------------------------------------------------------------------------------------------------------------------------------------------------------------------------------------------------------------|
|                               |                                          | methodologist. The second is a Physical Education researcher and the third and fourth authors are educational scientists who specialises in didactics and in Physical Education.                                                                                                                                                                                             |
|                               | Relationship with participants           |                                                                                                                                                                                                                                                                                                                                                                              |
| 6.                            | Relationship established                 | <p><b>Was a relationship established prior to study commencement?</b></p> <p>The teachers participating in the focus groups contacted the first author by the letter of invitation to the study described in the procedure section.</p> <p>On the other hand, the students accessed the questionnaires through the same invitation received from their own institutions.</p> |
| 7.                            | Participant knowledge of the interviewer | <p><b>What did the participants know about the researcher? e.g. <i>personal goals, reasons for doing the research</i></b></p> <p>The participants knew that researchers were from University of Zaragoza. The informed consent forms which the participants signed explained the general purposes of the study.</p>                                                          |
| 8.                            | Interviewer characteristics              | <p><b>What characteristics were reported about the interviewer/facilitator?</b></p> <p>The informed consent form presented the data of the principal investigator of the project regarding name, telephone number, e-mail and university.</p>                                                                                                                                |
| <b>Domain 2: study design</b> |                                          |                                                                                                                                                                                                                                                                                                                                                                              |
|                               | Theoretical framework                    |                                                                                                                                                                                                                                                                                                                                                                              |
| 9.                            | Methodological orientation and Theory    | <p><b>What methodological orientation was stated to underpin the study?</b></p> <p>Thematic analysis focuses on the identification of themes related to attitudes and evaluations about e-learning and hybrid teaching. Content analysis was chosen as methodological orientation.</p>                                                                                       |
|                               | Participant                              |                                                                                                                                                                                                                                                                                                                                                                              |

| No        | Item                         | Guide questions/description                                                                                                                                                                                                                                                                                                                                               |
|-----------|------------------------------|---------------------------------------------------------------------------------------------------------------------------------------------------------------------------------------------------------------------------------------------------------------------------------------------------------------------------------------------------------------------------|
| selection |                              |                                                                                                                                                                                                                                                                                                                                                                           |
| 10.       | Sampling                     | <p><b>How were participants selected?</b><br/>Participants were selected from faculties and universities, which offer the Teacher Training Degrees, according to the following criteria: the diversity of the public/private university, diversity in the university's origin, participant positive predisposition and accessibility for researchers.</p>                 |
| 11.       | Method of approach           | <p><b>How were participants approached? e.g. face-to-face, telephone, mail, email</b><br/>When participants confirmed their interest in participating, a first questionnaire with socio-demographic aspects was forwarded to the teachers. Then three discussion groups were set up. A link to a Google Form that included informed consent was sent to the students.</p> |
| 12.       | Sample size                  | <p><b>How many participants were in the study?</b><br/>Seventy-nine students and 13 teachers took part in the study.</p>                                                                                                                                                                                                                                                  |
| 13.       | Non-participation            | <p><b>How many people refused to participate or dropped out? Reasons?</b><br/>All participants participated in the study.</p>                                                                                                                                                                                                                                             |
| Setting   |                              |                                                                                                                                                                                                                                                                                                                                                                           |
| 14.       | Setting of data collection   | <p><b>Where was the data collected? e.g. home, clinic, workplace</b><br/>The focus groups were conducted using Google Meet. They lasted 1 hour each. The questionnaires were applied using Google Forms, with an approximate duration of between 10 and 20 minutes.</p>                                                                                                   |
| 15.       | Presence of non-participants | <p><b>Was anyone else present besides the participants and researchers?</b><br/>There was no-one else present besides the participants and researchers</p>                                                                                                                                                                                                                |
| 16.       | Description of sample        | <p><b>Description of sample</b><br/><br/>In this study, 79 university students (64 women/81.01% and 15 men/18.99%) took part, whose mean age was 23.01±4.96 years. They were registered for the different courses of the Teacher Training Degrees taught in</p>                                                                                                           |

| No              | Item                   | Guide questions/description                                                                                                                                                                                                                                                                                                                                                                                                                                                                                                                                                                                                                                                                                                                                                                                                                                                                                                                                                      |
|-----------------|------------------------|----------------------------------------------------------------------------------------------------------------------------------------------------------------------------------------------------------------------------------------------------------------------------------------------------------------------------------------------------------------------------------------------------------------------------------------------------------------------------------------------------------------------------------------------------------------------------------------------------------------------------------------------------------------------------------------------------------------------------------------------------------------------------------------------------------------------------------------------------------------------------------------------------------------------------------------------------------------------------------|
|                 |                        | <p>eight distinct public and private faculties and university centres. According to their training, 39 were Early Childhood Education students (49.37%), 38 studied Primary Education (48.10%) and two studied both degrees at the same time (2.53%). The inclusion criterion indicated that they could not be first-course students because first-course students would be unable to provide their view of what happened before confinement took place in March 2020. Five second-course (6.33%), 12 third-course (15.19%) and 62 fourth-course (78.48%) students participated. This study included also 13 teachers (8 women/61.54% and 5 men/38.46%), who also came from different public and private university faculties and centres. Their mean age was <math>43.15 \pm 9.85</math> years and their mean teaching experience was <math>3.08 \pm 6.38</math> years. Of the 13, five also occupy university management posts, such as Vice-Deans or Degree Coordinators.</p> |
| Data collection |                        |                                                                                                                                                                                                                                                                                                                                                                                                                                                                                                                                                                                                                                                                                                                                                                                                                                                                                                                                                                                  |
| 17.             | Interview guide        | <p><b>Were questions, prompts, guides provided by the authors? Was it pilot tested?</b><br/>The authors prepared a set of questions for the semi-structured interviews and focus groups in advance. It was not pilot tested.</p>                                                                                                                                                                                                                                                                                                                                                                                                                                                                                                                                                                                                                                                                                                                                                 |
| 18.             | Repeat interviews      | <p><b>Were repeat interviews carried out? If yes, how many?</b><br/>There were no repeat interviews.</p>                                                                                                                                                                                                                                                                                                                                                                                                                                                                                                                                                                                                                                                                                                                                                                                                                                                                         |
| 19.             | Audio/visual recording | <p><b>Did the research use audio or visual recording to collect the data?</b><br/>All focus groups were audio-recorded and video-recorded to be able to differentiate voices later.</p>                                                                                                                                                                                                                                                                                                                                                                                                                                                                                                                                                                                                                                                                                                                                                                                          |
| 20.             | Field notes            | <p><b>Were field notes made during and/or after the interview or focus group?</b><br/>The 4<sup>th</sup> author wrote field notes during the focus groups, but not at the end of them or during their transcription.</p>                                                                                                                                                                                                                                                                                                                                                                                                                                                                                                                                                                                                                                                                                                                                                         |
| 21.             | Duration               | <p><b>What was the duration of the interviews or focus group?</b></p>                                                                                                                                                                                                                                                                                                                                                                                                                                                                                                                                                                                                                                                                                                                                                                                                                                                                                                            |

| No                                         | Item                           | Guide questions/description                                                                                                                                                                                                                                                                                                                                                                                                                                             |
|--------------------------------------------|--------------------------------|-------------------------------------------------------------------------------------------------------------------------------------------------------------------------------------------------------------------------------------------------------------------------------------------------------------------------------------------------------------------------------------------------------------------------------------------------------------------------|
|                                            |                                | Open questions questionnaire took 10-20 minutes on average. Focus group interviews took 60 minutes.                                                                                                                                                                                                                                                                                                                                                                     |
| 22.                                        | Data saturation                | <b>Was data saturation discussed?</b><br>Yes, data saturation was discussed.                                                                                                                                                                                                                                                                                                                                                                                            |
| 23.                                        | Transcripts returned           | <b>Were transcripts returned to participants for comment and/or correction?</b><br>No, they were not.                                                                                                                                                                                                                                                                                                                                                                   |
| <b>Domain 3:<br/>analysis and findings</b> |                                |                                                                                                                                                                                                                                                                                                                                                                                                                                                                         |
| Data analysis                              |                                |                                                                                                                                                                                                                                                                                                                                                                                                                                                                         |
| 24.                                        | Number of data coders          | <b>How many data coders coded the data?</b><br>Fourth author was the unique coder of the data. Second author checked the coding.                                                                                                                                                                                                                                                                                                                                        |
| 25.                                        | Description of the coding tree | <b>Did authors provide a description of the coding tree?</b><br>Yes, in the Appendix.                                                                                                                                                                                                                                                                                                                                                                                   |
| 26.                                        | Derivation of themes           | <b>Were themes identified in advance or derived from the data?</b><br>Deductive analysis (to study previously raised problems and elements). The original classification tree was built based on the previously considered concept.<br>The final thematic analysis was promoted by previously established themes, with no emergent themes appearing during the content analysis.                                                                                        |
| 27.                                        | Software                       | <b>What software, if applicable, was used to manage the data?</b><br>Nvivo software (version 12 Plus, <a href="https://www.qsrinternational.com/nvivo/home">https://www.qsrinternational.com/nvivo/home</a> ) was used to analyze all content from open-ended questionnaires and focus groups.<br>SPSS (version 21.0, <a href="https://www.ibm.com/es-es/analytics/spss-statistics-software">https://www.ibm.com/es-es/analytics/spss-statistics-software</a> ) to OQQ. |
| 28.                                        | Participant checking           | <b>Did participants provide feedback on the findings?</b><br>No, they did not provide feedback on the findings.                                                                                                                                                                                                                                                                                                                                                         |
| Reporting                                  |                                |                                                                                                                                                                                                                                                                                                                                                                                                                                                                         |

| No  | Item                         | Guide questions/description                                                                                                                                                                                                                                                                                                                                                                                                                                                                                                                        |
|-----|------------------------------|----------------------------------------------------------------------------------------------------------------------------------------------------------------------------------------------------------------------------------------------------------------------------------------------------------------------------------------------------------------------------------------------------------------------------------------------------------------------------------------------------------------------------------------------------|
| 29. | Quotations presented         | <p><b>Were participant quotations presented to illustrate the themes / findings? Was each quotation identified? e.g. <i>participant number</i></b></p> <p>Thematic analysis came with some fragments of text that were obtained directly from the open questionnaires and the discussion groups. The code employed for this purpose included two elements: a descriptor (“US” for the university students and “TE” for the teachers; “TM” was used for those teachers who occupy university management posts), followed by a number (001-107).</p> |
| 30. | Data and findings consistent | <p><b>Was there consistency between the data presented and the findings?</b></p> <p>Yes, an attempt was made to gain consistency through various triangulations.</p>                                                                                                                                                                                                                                                                                                                                                                               |
| 31. | Clarity of major themes      | <p><b>Were major themes clearly presented in the findings?</b></p> <p>The major themes are clearly identified by section headings (“Employing ICT in usual teaching”, “Adapting e-learning during confinement” and four sections for the “Evaluating e-learning in mixed face-to-face and virtual (hybrid) teaching during the post confinement course”).</p>                                                                                                                                                                                      |
| 32. | Clarity of minor themes      | <p><b>Is there a description of diverse cases or discussion of minor themes?</b></p> <p>Diverse cases were considered, for example negative cases or unexpected examples as set out by previous literature.</p>                                                                                                                                                                                                                                                                                                                                    |
